# Supplementary material for: PK/PD Mediated Dose Optimization of Emactuzumab, a CSF1R Inhibitor, in Patients With Advanced Solid Tumors and Diffuse‐Type Tenosynovial Giant Cell Tumor
Source: PubMed Central journal article supplement — Clin Pharmacol Ther. 2020 Jul 24;108(3):616–24. doi: 10.1002/cpt.1964 (PMC7589268; doi:10.1002/cpt.1964), 2020-07-24

Figure S1. Goodness of fit plots for the Population PK model

**DV vs. PRED | run3**

Ofv: 11837.802

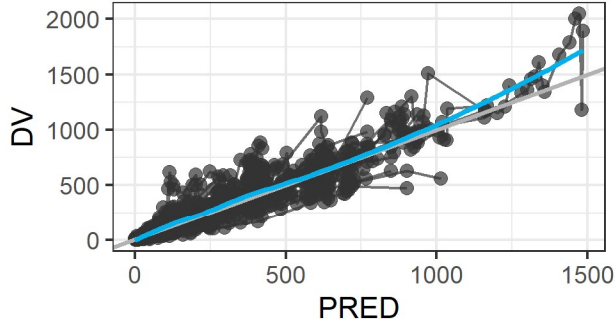

**DV vs. IPRED | run3**

Ofv: 11837.802, Eps shrink: 7.1 [1]

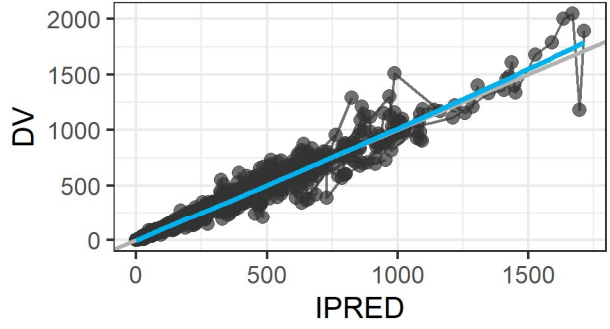

**abs(CWRES) vs. PRED | run3**

Ofv: 11837.802

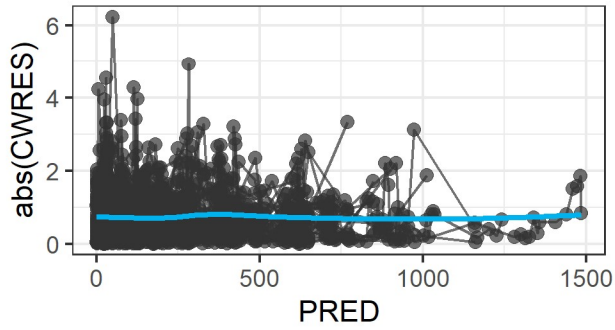

**CWRES vs. TIME | run3**

Ofv: 11837.802

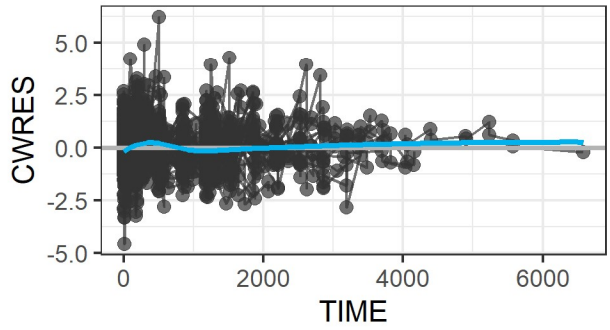

Supplement: CPT-108-616-s001.pdf [file CPT-108-616-s001.pdf]
