# Supplementary figures and images for: PK/PD Mediated Dose Optimization of Emactuzumab, a CSF1R Inhibitor, in Patients With Advanced Solid Tumors and Diffuse‐Type Tenosynovial Giant Cell Tumor
Source: PubMed Central journal article supplement — Clin Pharmacol Ther. 2020 Jul 24;108(3):616–24. doi: 10.1002/cpt.1964 (PMC7589268; doi:10.1002/cpt.1964), 2020-07-24

# PK model vpc

## Visual predictive checks | run3

Number of simulations: 200, confidence interval: 95%

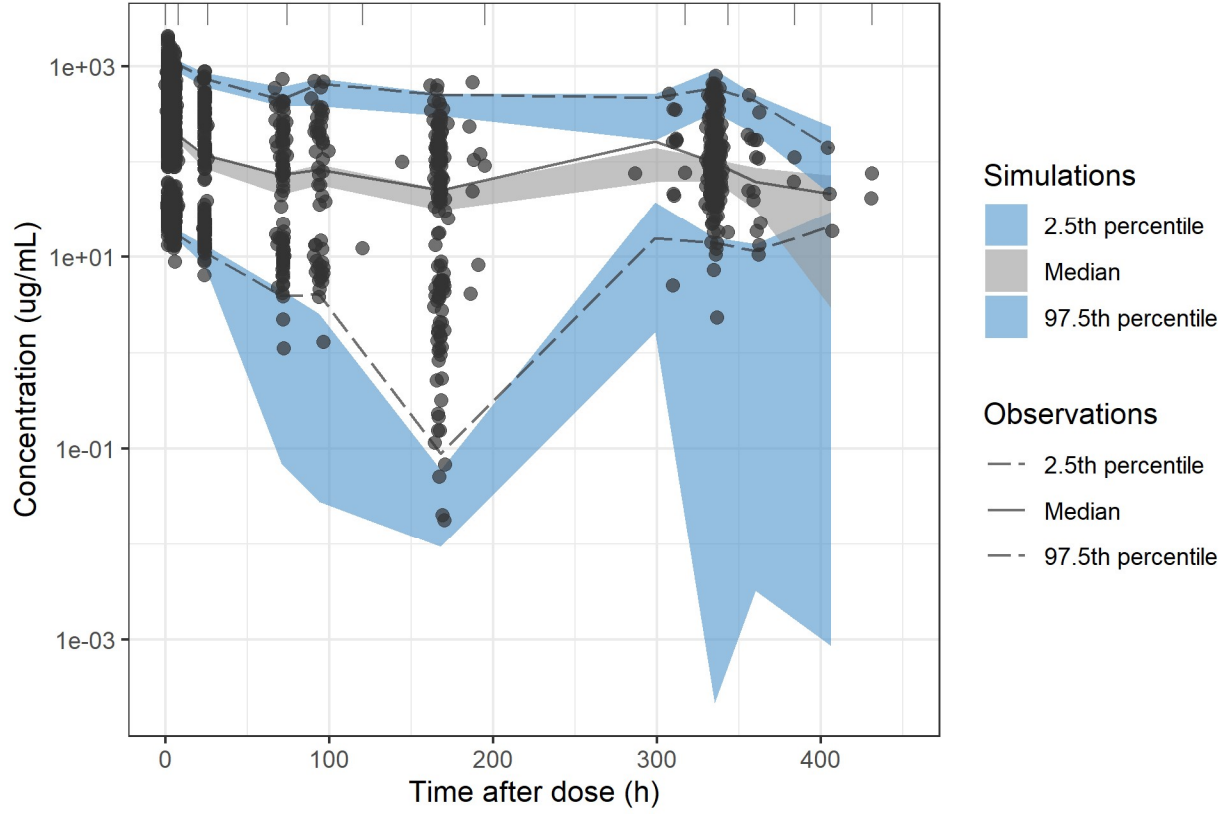

Supplement: CPT-108-616-s007.pdf [file CPT-108-616-s007.pdf]
